# Supplementary material
Source: publisher site journal article supplement (https://www.kjim.org/upload/media/kjim-2021-026-suppl7.pdf)
Supplement: Supplementary file 1 [file kjim-2021-026-suppl7.pdf]

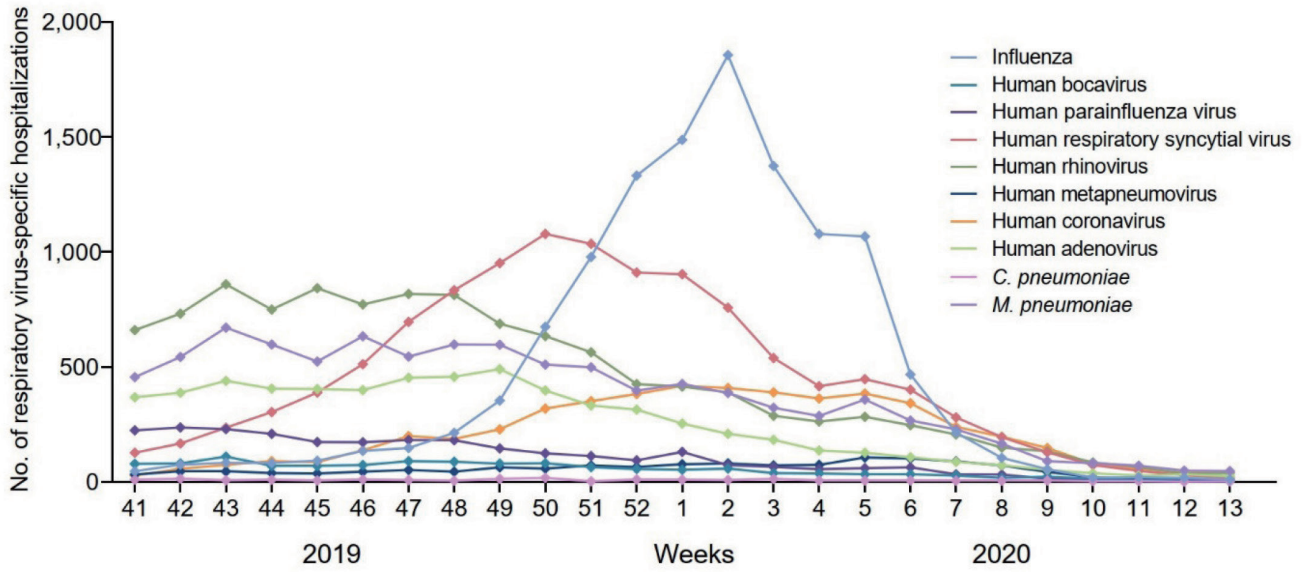

**Supplementary Figure 2.** Weekly change in the number of hospitalized adults with an acute respiratory viral infection.
